1  
2  
3  
4  
5  
6  
7  
8  
9  
10  
11  
12  
13  
14  
15  
16  
17  
18  
19  
20  
21  
22  
23  
24

## **Coadaptation of the chemosensory system with voluntary exercise behavior in mice**

Quynh Anh Thi Nguyen<sup>1</sup>, David Hillis<sup>2</sup>, Sayako Katada<sup>3</sup>, Timothy Harris<sup>2</sup>, Crystal Pontrello<sup>4</sup>, Theodore Garland, Jr.<sup>1,2,5</sup> and Sachiko Haga-Yamanaka<sup>1,2,4\*</sup>

<sup>1</sup> Neuroscience Graduate Program, University of California Riverside, Riverside, California, USA

<sup>2</sup> Graduate Program in Genetics, Genomics & Bioinformatics, University of California Riverside, Riverside, California, USA

<sup>3</sup> Department of Stem Cell Biology and Medicine, Graduate School of Medical Sciences, Kyushu University, Fukuoka, Fukuoka, Japan

<sup>4</sup> Department of Molecular, Cell, and Systems Biology, University of California Riverside, Riverside, California, USA

<sup>5</sup> Department of Evolution, Ecology and Organismal Biology, University of California Riverside, Riverside, California, USA

\*Corresponding author

Email: sachikoy@ucr.edu

25 **Abstract**

26 Ethologically relevant chemical senses and behavioral habits are likely to coadapt in response  
27 to selection. As olfaction is involved in intrinsically motivated behaviors in mice, we hypothesized  
28 that selective breeding for a voluntary behavior would enable us to identify novel roles of the  
29 chemosensory system. Voluntary wheel running (VWR) is an intrinsically motivated and naturally  
30 rewarding behavior, and even wild mice run on a wheel placed in nature. We have established 4  
31 independent, artificially evolved mouse lines by selectively breeding individuals showing high VWR  
32 activity (High Runners; HRs), together with 4 non-selected Control lines, over 88 generations. We  
33 found that several sensory receptors in specific receptor clusters were differentially expressed between  
34 the vomeronasal organ (VNO) of HRs and Controls. Moreover, one of those clusters contains multiple  
35 single-nucleotide polymorphism loci for which the allele frequencies were significantly divergent  
36 between the HR and Control lines, i.e., loci that were affected by the selective breeding protocol.  
37 These results indicate that the VNO has become genetically differentiated between HR and Control  
38 lines during the selective breeding process, strongly suggesting the chemosensory receptors as  
39 quantitative trait loci (QTL) for voluntary exercise in mice. We propose that olfaction may play an  
40 important role in motivation for voluntary exercise in mammals.

41

42

## 43 **Introduction**

44           Chemical senses are involved in many aspects of behavior. Olfaction is especially  
45 important for controlling such intrinsically motivated behaviors as food-seeking, social  
46 interactions, and reproductive- and fear-driven behaviors [1]. An ethologically relevant cue is  
47 detected by chemosensory receptors expressed in the sensory organs, which activate a specific  
48 neural circuitry for behavioral motivation and induces an appropriate behavioral output in a  
49 specific context. Comparative functional studies involving insect model species proposed a model  
50 wherein changes in chemoreceptor identity and expression are sufficient to provoke changes in  
51 neural circuit activity and behavioral outputs [2]. Thus, ethologically relevant cues, receptors,  
52 neural circuitries, and behavioral habits are likely to evolve together (coadapt) in response to  
53 natural and sexual selection.

54           One olfactory organ, the vomeronasal organ (VNO), occurs in some amphibians,  
55 squamates, and some mammals, including rodents. The VNO is known to detect intraspecific  
56 signals known as pheromones that trigger behavioral and physiological changes in receivers [3].  
57 Pheromones are non-volatile peptides and small molecular weight compounds that are excreted in  
58 such fluids as urine and tears. These molecules are taken up from the environment to the VNO by  
59 direct contact and activate the vomeronasal sensory neurons (VSNs) [4, 5]. Generally, each VSN  
60 expresses a member of the vomeronasal receptor families: *type 1 vomeronasal receptors (Vmn1rs)*,  
61 *type 2 vomeronasal receptors (Vmn2rs)*, and *formyl peptide receptors (Fprs)*, with some  
62 exceptions [6-10]. The signals detected by these receptors in the VSNs are axonally sent to  
63 glomerular structures and synaptically transmitted to the postsynaptic neurons, also known as  
64 mitral-tufted cells, in the accessory olfactory bulb (AOB) [11, 12]. The signals are then processed

65 in the amygdala and hypothalamus, which induce the animal's instinctive behavioral responses  
66 and endocrinological changes [3, 13, 14].

67         Rapid evolution of the receptor genes is a pronounced feature of the vomeronasal system  
68 [15-28]. Different species of animals have divergent family members of vomeronasal receptor  
69 genes [20, 23-25, 29, 30]. Even within the *Mus musculus* (house mouse) species complex,  
70 variation in the coding sequence is frequently observed [15]. Moreover, the abundance of receptor  
71 genes expressed in the VNO varies even among different inbred mouse strains [31]. Distributions  
72 of single nucleotide polymorphisms (SNPs) observed in lab-derived strains are non-random, and  
73 correlated with vomeronasal receptor phylogeny as well as genomic clusters [15]. These  
74 observations led us to hypothesize that selective breeding for a behavior that is modulated by  
75 chemosensory signals would induce an alteration in genomic clusters of vomeronasal receptors  
76 that are potentially involved in the behavior.

77         Voluntary wheel running (VWR) is an intrinsically motivated behavior, and even wild  
78 mice run on a wheel placed in nature [32]. Notably, VWR is one of the most widely studied  
79 behaviors in laboratory rodents [33-35]. Individual differences in VWR are highly repeatable on a  
80 day-to-day basis, the trait is heritable within outbred populations of rodents, and genes and  
81 genomic regions associated with VWR are being identified [36]. Moreover, some of the  
82 underlying causes of variation in VWR have been elucidated, in terms of both motivation and  
83 ability for voluntary exercise [34, 37, 38]. Importantly, a previous study demonstrated that the  
84 presence of conspecific urine increased VWR activity level in adult wild-derived mice [39],  
85 suggesting that external chemosensory cues also have a modulatory role in VWR activity.

86         We have established 4 independent, artificially evolved mouse lines by selectively  
87 breeding individuals showing high VWR activity (High Runners; HRs), along with 4 independent,

88 non-selected Control lines over 88 generations [40, 41]. Briefly, all 4 HR lines run ~2.5–3.0-fold  
89 more revolutions per day as compared with the 4 Control lines [42, 43]. Studies of mice allowed  
90 access to clean wheels or those previously occupied by a different mouse revealed that HRs show  
91 higher sensitivity to previously-used wheels and display greater alteration in daily wheel running  
92 activities than the Controls [44]. This result suggests that selective breeding for high running  
93 activity was accompanied by altered sensitivity to other individuals, suggesting a potential  
94 coadaptation of the chemosensory system with voluntary wheel running.

95 In this study, we examined whether selective breeding for VWR has differentiated the  
96 vomeronasal receptor genes between HR and Control lines. We found that a repertoire of receptor  
97 genes was differentially expressed between the VNO of HR and Control lines, which resulted  
98 from reduction or increase of specific vomeronasal receptor-expressing cells in the VNO of HR  
99 lines. We also found that this gene expression change was partially due to the genetic alteration  
100 upon selective breeding for VWR, suggesting a relationship between high running activity and the  
101 function of the VNO in HR lines. Taken together, our results indicate vomeronasal receptors as  
102 QTL for voluntary exercise behavior in mice.

103

## 104 **Results**

### 105 **Differential expression of chemosensory receptors in the VNO of HR and Control lines**

106 To examine the impact of selective breeding for VWR activity on receptor gene expression  
107 in the VNO, we conducted transcriptome analysis of the VNO from HR and Control lines. For  
108 each of the 4 HR and 4 Control lines, total RNA samples were prepared, each consisting of the  
109 combined VNOs from 3 individual males (Fig 1A). After RNA sequencing, we identified 76

110 differentially expressed (DE) genes in the HR line group compared to the Control line group (Fig  
111 1B). There are 13 chemosensory receptor genes in the DE gene set, and all of them belong to  
112 either the *Fpr*, *Vmn1r* or *Vmn2r* family of the vomeronasal receptor genes (Fig 1B, shown in red).  
113 Of the 13 DE receptor genes, the Reads Per Kilobase Million (RPKM) of *Fpr3*, *Vmn2r8*, *Vmn2r9*,  
114 *Vmn2r11*, *Vmn2r96*, *Vmn2r98*, *Vmn2r102* and *Vmn2r110* were significantly up-regulated, while  
115 *Vmn1r188*, *Vmn1r236*, *Vmn2r15*, *Vmn2r16* and *Vmn2r99* were significantly down-regulated in the  
116 VSNs of HR lines compared to Control lines (Fig 1C). The RPKM of *olfactory marker protein*  
117 (*OMP*), which is abundantly and exclusively expressed in all mature VSNs in the VNO [45], was  
118 not different between HR and Control lines (Fig 1D), indicating that receptor gene expression  
119 changes were not due to variation in VSN number. The log<sub>2</sub> fold change of normalized  
120 expression of the DE genes varied from -3.4 to 2.0 (Fig 1E). *Vmn2r11* and *Vmn2r16* showed the  
121 largest upregulation and downregulation, respectively. These results suggest that expression of the  
122 chemosensory receptor genes is differentially regulated in the VSNs between HR and Control  
123 lines.

124

### 125 **Accumulation of all-or-none SNPs in a vomeronasal receptor cluster**

126 We then hypothesized that differences between HR and Control lines in vomeronasal  
127 receptor gene expression would be associated with differences in allele frequencies between HR  
128 and Control lines caused by the selective breeding. Previous genome-wide SNP analysis detected  
129 152 out of 25,318 variable SNP loci for which allele frequencies were significantly different  
130 between HR and Control lines after correction for multiple comparisons [46]. As explained in the  
131 previous paper, the differentiation in allele frequencies for these 152 loci cannot be attributed to  
132 random genetic drift. Of the 152 SNP loci, we particularly focused on 61 loci that were fixed for

133 the same allele in all 4 replicate HR lines but not fixed in any of the 4 replicate Control lines, or  
134 vice versa (which we term “all-or-none SNPs”, Supplemental table 1). The 61 SNP loci were not  
135 randomly distributed throughout the genome (Supplemental Fig 1A). The majority of them (59 of  
136 61) existed as a member of groups of 3 or more which were located in close proximity on the  
137 genomic chromosomes (Supplemental Fig 1B). As a result, only 11 all-or-none SNP clusters were  
138 observed in the genome (Supplemental Fig 1A)

139         Interestingly, 8 of the 61 all-or-none SNP loci were located in a ~3 Mb interval on  
140 chromosome 17 that contains clusters of *Vmn1rs* (14), *Vmn2rs* (21), and *Fprs* (7) (Fig 2A).  
141 Strikingly, 7 out of the 13 DE vomeronasal receptors are located in this all-or-none SNP cluster.  
142 Five of the all-or none SNPs are localized near the differentially expressed vomeronasal receptors  
143 (Fig 2B): SNP ID rs33447983 at 8.4 kb downstream of *Vmn2r99*, rs6224641 at 29 kb downstream  
144 of *Vmn2r99*, rs33649277 at 44 kb upstream of *Vmn2r102*, rs29522462 at 8.5 kb upstream of  
145 *Vmn2r109* and 524 bp downstream of *Vmn2r110*, and rs33120398 at 22 kb upstream of *Vmn2r109*  
146 and intron 1 of *Vmn2r110*. Other SNPs, such as rs33463529, are also closely located near  
147 vomeronasal receptors, though changes in expression of the nearby receptors were not observed.  
148 These results strongly suggest that changes in vomeronasal receptor gene expression between HR  
149 and Control lines are at least partially caused by changes in allele frequencies at multiple loci in  
150 response to selective breeding for VWR activity.

151         The rest of the DE vomeronasal receptors are located in another single ~1 Mb genomic  
152 cluster on chromosome 5 (Fig 2C), with one exception that is located on chromosome 13 (Fig 2D).  
153 Neither cluster contained SNP loci that are significantly differentiated between HR and Control  
154 lines [46]. Therefore, expression changes of the receptor genes in these clusters may be mediated  
155 by SNPs that remain polymorphic in both lines, or by different mechanisms.

156

### 157 **Differential number of *Fpr3*-expressing VSNs in the VNO of HR and Control lines**

158 To determine the significance at the cellular level in the VNO of the DE chemosensory  
159 receptor genes, we chose one representative gene to determine whether there are differences in the  
160 number of receptor-expressing VSNs, or alternatively, differences in transcript abundance in each  
161 receptor-expressing VSN. We performed *in situ* hybridization to detect *Fpr3* using RNAscope *in*  
162 *situ* hybridization in the VNO of 2-3 individual mice from each of the 4 HR and 4 Control lines,  
163 together with a probe for the *Gαo* (*Gnao1*). Expression of *Fpr3* is ~3 times higher in HR lines  
164 compared to Control lines in RNAseq analysis (Fig 1C). Although *Fpr3*-expressing VSNs were  
165 observed in the VNO of both HR and Control lines, the number of *Fpr3*-expressing VSNs in each  
166 VNO slice varied among lines (Fig 3A, B). In 3 Control lines (line 1, 4, and 5), *Fpr3* signal was  
167 barely observed in each VNO tissue slice, while Control line 2 had a significantly higher number  
168 of *Fpr3*-expressing VSNs in each slice (Fig 3B, one-way ANOVA ( $p < 0.0001$ ) with Tuckey's  
169 *post hoc* test ( $p < 0.01$ )). This result was consistent with the RNAseq data, in which the amount of  
170 *Fpr3* transcripts in line 2 was higher than other Control lines (Fig 1B, highlighted with a red under  
171 line). On the other hand, we consistently observed multiple *Fpr3*-expressing VSNs in most of the  
172 VNO tissue slices from the 4 HR lines. The number of *Fpr3*-expressing VSNs in each HR lines  
173 was significantly higher than that of Control line 1, 4, and 5 (Fig 3B, one-way ANOVA ( $p <$   
174  $0.0001$ ) with Tuckey's *post hoc* test ( $p < 0.05$ )) and did not differ among the 4 HR lines and  
175 Control line 2 (Fig 3B). Generally, there were significantly more *Fpr3*-expressing VSNs in the HR  
176 versus the Control lines (Fig 3C, unpaired t test ( $p < 0.05$ )), and the fluorescent intensity derived  
177 from *Fpr3* gene transcripts in each VSN was not distinguishable between the VNO tissues from  
178 HR and Control lines (Fig 3D and E). Taken together, these results demonstrate that the different



179 expression levels of the chemosensory receptors result from changes in the number of receptor-  
180 expressing VSNs. Thus, the number of VSNs expressing specific sets of chemosensory receptors  
181 are differentially regulated after selective breeding for VWR.

182

## 183 **Discussion**

184 In this study, we utilized a unique animal model: 4 replicate mouse lines that have been  
185 experimentally evolved by selectively breeding individuals showing high VWR activity (HR lines),  
186 along with their 4 independent, non-selected Control lines maintained over 88 generations [40].  
187 The HR and Control lines provide a strong model for determining the contribution of genetics to  
188 voluntary-exercise related traits [41]. In addition to the exercise ability-related genetic adaptations  
189 found after selective breeding [34, 41], several changes at the level of the central nervous system  
190 have also been identified, which contribute to elevation of VWR for HR mice [34, 37, 47].  
191 Through SNP mapping analysis (Supplemental Fig 1), we found that 3 of the 61 all-or-none SNP  
192 loci that were fixed in all 4 replicate HR lines (but none of the 4 replicate Control lines) were  
193 located in a genomic cluster exclusively containing T-box genes on Chromosome 5. These genes  
194 are associated with GO terms of “bundle of His development,” “embryonic forelimb  
195 morphogenesis,” “cardiac septum morphogenesis,” “ventricular septum development,” and  
196 “cardiac muscle cell differentiation”. Indeed, compared with their 4 non-selected Control line  
197 counterparts, mice from the 4 replicate HR lines have been shown to have increased ventricular  
198 mass [42, 48-50], as well as altered cardiac functions [50-52]. Thus, the genome-wide SNP  
199 analysis of HR and Control lines of mice [46] could robustly identify QTL associated with  
200 voluntary exercise behavior.

201 Vomeronasal receptors are among the most rapidly evolving genes in vertebrates [15-28].  
202 Different taxonomic groups have divergent family members of vomeronasal receptor genes [18,  
203 20, 23-25, 29, 30], and the abundance of receptor genes expressed in the VNO is different even  
204 among inbred mouse strains [31]. Moreover, many of the mouse pheromones identified as ligands  
205 for vomeronasal receptors show strain specificity. For example, expression of the male pheromone  
206 ESP1 is only observed in a few inbred strains, although males of wild-derived strains all secrete  
207 abundant ESP1 peptide into their tears [53]. Likewise, expression of juvenile pheromone ESP22 is  
208 missing in some inbred strains [54]. Major urinary proteins (MUPs) are potential ligands for  
209 vomeronasal receptors, and all male mice of a given inbred strain secrete identical MUP members,  
210 whereas wild-derived mice each exhibit a unique profile of emitted MUPs [55]. Thus, pheromones  
211 and vomeronasal receptors in the vomeronasal system may have evolved in response to various  
212 environmental changes, including domestication, which resulted in alteration of coding sequences  
213 and expression patterns.

214 Considering the extensive evolution of receptor genes, selective breeding for a  
215 chemosensory-mediated behavior is an attractive alternative approach to reveal the functions of  
216 vomeronasal receptors. VWR activity of a mouse strain that recently derived from the wild has  
217 been shown to be increased by urinary chemosignals from other individuals [39]. Therefore, if the  
218 function of the VNO is involved in the modulation of VWR activity, then we would expect that  
219 selective breeding for high VWR activity should impact vomeronasal receptors. Indeed, we found  
220 that expression levels of several vomeronasal receptor genes as well as a few SNPs near the DE  
221 receptor genes were different between HR and Control lines. Although the role of each DE  
222 receptor in VWR activity needs to be determined in future studies, the current results suggest that  
223 vomeronasal chemosensory receptors could be important QTLs for voluntary exercise in mice.

224           One of the important remaining questions is how the vomeronasal system modulates VWR  
225 behavior in HR lines. One study measuring patterns of brain activity using c-Fos  
226 immunoreactivity revealed multiple areas in the brain that appear to be associated with motivation  
227 for VWR in HR lines [56]. These areas include brain nuclei known to be motivation-related, such  
228 as the prefrontal cortex, medial frontal cortex, and nucleus accumbens (NAc) [56]. In addition, it  
229 was recently shown in mice that VNO-mediated signals regulate the mesolimbic dopaminergic  
230 system, especially by upregulating the ventral tegmental area (VTA)-NAc circuit, and that they  
231 enhance reproductive motivation in mice [12]. Thus, it is possible that the VNO-mediated  
232 chemosensory signals also upregulate VWR activity by stimulating the VTA-NAc circuit.  
233 Moreover, one of the hypothalamic targets of the vomeronasal system, the medial preoptic area  
234 (MPOA), has been shown to regulate wheel-running activity in a hormone-dependent manner [57-  
235 60]. It is therefore also conceivable that the VNO-mediated chemosensory signals upregulate  
236 VWR by directly activating MPOA neurons. Combined with these previous observations, we  
237 propose that chemosensory signals detected by the VNO activate specific areas of the central  
238 nervous system that contribute to VWR activity. Future studies are expected to reveal the role of  
239 the VNO in modulating physical exercise and other voluntary behaviors in rodents.

240

## 241 **Materials and Methods**

### 242 **Animals**

243           The experimental procedures were approved by the UCR Institutional Animal Care and  
244 Use Committee and were in accordance with the National Institutes of Health Guide for the Care  
245 and Use of Laboratory Animals. The VNOs studied were from 12-week old male and female mice

246 of 4 lines selected for high voluntary wheel running and 4 Control lines. The studied mice were  
247 derived from generation 88 of a replicated selective breeding experiment for increased voluntary  
248 wheel running behavior on the Hsd:ICR strain [40]. Wheel revolutions were recorded in 1-minute  
249 intervals continuously for 6 days, and mice were selected within-family for the number of  
250 revolutions run on days 5 and 6. In each selected HR line, the highest-running male and female  
251 within 10 individual families were selected per generation and each mouse was mated to a mouse  
252 from another family, within its line. This within-family selection regimen minimized inbreeding  
253 such that the effective population size was approximately 35 in each line [40]. In the Control lines,  
254 one female and one male within each family were chosen at random, though full sibling mating  
255 was again prevented. The mice in the present study were neither full nor half-siblings.

256

257 RNA sequencing

258 The VNO tissues were harvested from 3 male mice from each of the 4 HR and 4 Control  
259 lines, immediately transferred to RNA later (Sigma-Aldrich), then stored at  $-80^{\circ}\text{C}$  until use for  
260 RNA-seq. VNO tissues from the same line of mice were pooled and homogenized in Trizol  
261 Reagent (Life Technologies, Carlsbad, CA) and processed according to the manufacturer's  
262 protocol. Trizol-purified RNA samples were quantified using Qubit1 2.0 (Life Technologies). The  
263 integrity of isolated RNA was measured by the 28S/18S rRNA analysis using the Agilent 2100  
264 Bioanalyzer (Agilent Technologies, Santa Clara CA) with RNA Nano chip (Agilent Technologies,  
265 Palo Alto, CA). Samples had RNA integrity number values of at least 8.30. Using the Ultra II  
266 Directional RNA Library Prep kit (NEB), each RNA sample was depleted of ribosomal RNA and  
267 used to prepare an RNA-seq library tagged with a unique barcode at the UCR IIGB Genomics  
268 Core. Libraries were evaluated and quantified using Agilent 2100 Bioanalyzer with High

269 Sensitivity DNA chip, then sequenced with the Illumina NextSeq 500 system (Illumina, San Diego,  
270 CA, USA) and 75nt-long single-end reads were generated at the UCR IIGB Genomics Core. A  
271 total of 8 libraries (4 HR lines and 4 Control lines) were multiplexed and sequenced in a single  
272 lane which yielded ~11,000  $\times$  M reads, averaging ~1,400  $\times$  M reads per sample.

273 The RNA-seq data files are available in the National Center for Biotechnology Information  
274 Gene Expression Omnibus (GEO) database (accession identifier GSE146644).

275

276 Differential gene expression analysis

277 The analysis compared the transcriptome profiles from the HR and Control lines of mice.  
278 Quality control of the sequence reads included a minimum average Phred score of 30 across all  
279 positions using FastQC. Sequencing reads were aligned to the mouse reference genome  
280 (GRCm38/mm10), using STAR aligner ver. 2.6.1d [61] with an increased stringency unforgiving  
281 any of mismatches per each read ('-outFilterMismatchNmax 0'). Any reads that map to multiple  
282 locations in the genome are not counted ('-outFilterMultimapNmax 1') since they cannot be  
283 assigned to any gene unambiguously. In order to determine the differentially expressed (DE) genes,  
284 generated BAM files were accessed with Cuffdiff [62], a program included in Cufflinks. Cuffdiff  
285 reports reads per kp per million mapped reads (RPKM), log<sub>2</sub> fold change, together with *p*-value,  
286 and *q*-values. After Benjamini-Hochberg false discovery correction, genes with adjusted *p*-values  
287 less than 0.05 were considered as DE genes.

288

289 Analysis of all-or-none SNPs

290 SNP data in supplemental table 7 (Data\_S7) in Xu and Garland (2017) [46] were used for  
291 this analysis. SNPs that separate all 4 HR and 4 Control lines (which we term all-or-none SNPs)  
292 were selected (Supplemental Table 1) and mapped onto mouse genome (NCBI37/mm9) using  
293 UCSC Genome Browser (<https://genome.ucsc.edu>). We noticed that most of the all-or-none SNPs  
294 occurred in groups. Thus, we mapped those SNP clusters onto genomes (Supplemental Fig 1A).  
295 Each cluster was defined - and + 0.1 Mb from the first and last SNP, respectively, observed in a  
296 specific location of the genome. Information of coding genes in each SNP cluster were extracted  
297 (Supplemental Fig 1B), For some clusters, Gene-to-GO mappings was performed with PANTHER  
298 (<http://pantherdb.org>).

299

300 RNAscope *in situ* hybridization

301 Female mice (11 Controls and 9 HRs) were utilized for this analysis. The animals were  
302 intracardially perfused with 4% Paraformaldehyde in Phosphate Buffered Saline (PBS). VNOs  
303 were dissected from perfused animals and fixed overnight. The VNO samples were decalcified in  
304 EDTA pH 8.0 for 48 hours, then cryoprotected in 15% sucrose in PBS followed by 30% sucrose in  
305 PBS. All samples were ultimately embedded in optimal cutting temperature (OCT) medium  
306 (Electron Microscopy Sciences) above liquid nitrogen and sectioned at 20  $\mu$ m using Leica  
307 CM3050S Cryostat. Slides were stored at -80°C until use for *in situ* hybridization staining.

308 RNA detection in VNOs were performed with ACD RNAscope® control and target  
309 GNAO1 (ACD # and FPR3 (ACD #503451) using RNAscope® Multiplex Fluorescent Reagent  
310 Kit v2 (ACD# 323100) Assay. Probe binding was detected with Akoya Biosciences' Opal 690  
311 (FP1497001KT) and 570 (FP1488001KT) Dyes at 1:750 dilution in RNAscope TSA Buffer.  
312 Nuclear staining was visualized with DAPI (EMS #17989-20). Images were acquired at 20X or

313 40X magnification on Zeiss Axio Imager.M2, and FPR3-positivity was quantified with a  
314 proprietary script using QuPath software. Fluorescent intensity was measured by Fiji software. 4-8  
315 slices in each animal were examined. One-way ANOVA with Tuckey's *post hoc* test was used in  
316 Fig 3B. An unpaired t-test was used to examine statistical significance in Fig 3C and E.

317

## 318 **Acknowledgments**

319 We thank Drs C. R. Yu, H. Matsunami, T. Girke, P. Campbell, C. A. Scott, M. Riccomagno and N.  
320 Yamanaka for helpful discussion and comments on the manuscript. We are grateful for technical  
321 assistance from Office of Campus Veterinarian, and Genomics Core Facility at University of  
322 California, Riverside (UCR).

323

## 324 **Author contributions**

325 S.H.Y. and T.G. designed the project. Q.A.N., D.H., and C.P. performed experiments. Q.A.N.,  
326 S.K., T.H., T.G. and S.H.Y analyzed data. S.H.Y wrote the manuscript with comments from all  
327 authors.

328

## 329 **Figure Legends**

330 Figure 1. RNAseq analysis of the vomeronasal organs of High Runner and Control mice  
331 (A) Schematic of RNAseq sampling for analysis. (B) Heatmap of differentially expressed (DE)  
332 genes between HR and Control lines. DE vomeronasal receptors are shown in red. Fpr3 is

333 highlighted with a red underline. (C and D) Scatter plots showing the RPKM of DE *vomeronasal*  
334 *receptor* (C) and *Omp* (D) genes in each line of HR or C mice. Error bars represent  $\pm$  S.E.M.. (E)  
335 Bar graph denoting  $\log_2$  fold change of the relative expression of DE vomeronasal receptor genes  
336 between the HR and Control lines.

337

338 Fig 2. Genomic clusters containing the differentially expressed vomeronasal receptors

339 (A, C and D) Genomic clusters of DE vomeronasal receptor genes in the mouse chromosomes 17  
340 (A), 5 (C), and 13 (D). Vomeronasal receptors in red and blue indicate up- and down-regulations,  
341 respectively. Non-DE genes are shown in black. Purple arrowheads in (A) indicate locations of  
342 SNPs that are significantly differentiated between HR and Control groups [46], as shown in a table  
343 (B).

344

345 Fig 3. RNA scope *in situ* hybridization analysis of a DE receptor gene in the VNO

346 (A) Images showing RNAscope-derived fluorescent signals for *Fpr3* (left) and *Gnao1* (middle)  
347 transcripts. In merged images (right), *Fpr3* and *Gnao1* are shown in red and yellow, respectively,  
348 together with DAPI staining (blue). Upper and lower panels show representative images from the  
349 VNO of a Control (line5) line and a HR (line3) line, respectively. (B) A violin plot showing the  
350 number of *Fpr3* signals in 1,000 vomeronasal sensory neurons per VNO slice for each line of mice.  
351  $n = 10 - 22$  slices in 2 - 3 mice per line. The plots with different letters are significantly different in  
352 ANOVA ( $p < 0.0001$ ) with Tuckey's *post hoc* test ( $p < 0.05$ ). (C) The mean number of *Fpr3*  
353 signals in 10,00 VSNs in Control and HR lines. Each dot indicates the mean of one line. Error bars  
354 represent  $\pm$  S.E.M.. \* indicates  $p < 0.05$  in a *t*-test. (D) Representative images showing *Fpr3*



355 signals (red) observed in the VNO of Control and HR lines of mice. DAPI signals are shown in  
356 blue. (E) The mean of *Fpr3* signal intensity (arbitrary unit, AU) per VSN in the Control and HR  
357 lines. Each dot indicates the mean of one line.

358

359 Supplemental Table 1.

360 Genomic locations, *p*-value by the mixed model approach [46], and allele frequencies of the 61  
361 all-or-on SNP loci.

362 Supplemental Fig 1. Analysis of all-or-none SNP loci in HR and Control lines of mice

363 (A) A schematic diagram showing the relative positions of loci containing 1 or more all-or-none

364 SNPs. Blue triangles indicate non-chemosensory clusters, and a red triangle indicates clusters

365 containing only chemosensory (vomeronasal) receptors. (B) A table showing chromosomal

366 location and length of each all-or-non SNP cluster, and the number of SNPs and genes within the

367 clusters. The row highlighted in red is the cluster containing only the vomeronasal receptor genes.

368

369

## 370 **References**

- 371
- 372 1. Nielsen BL. Olfaction in animal behaviour and welfare: CABI; 2017 2017/6/29. 233 p.
- 373 2. Cande J, Prud'Homme B, Gompel N. Smells like evolution: the role of chemoreceptor  
374 evolution in behavioral change. *Curr Opin Neurobiol.* 2013;23(1):152-8. doi:  
375 10.1016/j.conb.2012.07.008.
- 376 3. Liberles SD. Mammalian pheromones. *Annu Rev Physiol.* 2014;76(1):151-75. doi:  
377 10.1146/annurev-physiol-021113-170334.
- 378 4. Halpern M. The organization and function of the vomeronasal system. *Annu Rev Neurosci*  
379 1987;10(1):325-62. doi: 10.1146/annurev.ne.10.030187.001545.
- 380 5. Halpern M. Structure and function of the vomeronasal system: an update. *Prog Neurobiol.*  
381 2003;70(3):245-318. doi: 10.1016/s0301-0082(03)00103-5.
- 382 6. Dulac C, Axel R. A novel family of genes encoding putative pheromone receptors in  
383 mammals. *Cell.* 1995;83(2):195-206. doi: 10.1016/0092-8674(95)90161-2.
- 384 7. Herrada G, Dulac C. A novel family of putative pheromone receptors in mammals with a  
385 topographically organized and sexually dimorphic distribution. *Cell.* 1997;90(4):763-73. doi:  
386 10.1016/s0092-8674(00)80536-x.
- 387 8. Matsunami H, Buck LB. A multigene family encoding a diverse array of putative pheromone  
388 receptors in mammals. *Cell.* 1997;90(4):775-84. doi: 10.1016/s0092-8674(00)80537-1.
- 389 9. Rivière S, Challet L, Fluegge D, Spehr M, Rodriguez I. Formyl peptide receptor-like  
390 proteins are a novel family of vomeronasal chemosensors. *Nature.* 2009;459(7246):574-7.  
391 doi: 10.1038/nature08029.
- 392 10. Liberles SD, Horowitz LF, Kuang D, Contos JJ, Wilson KL, Siltberg-Liberles J, et al.  
393 Formyl peptide receptors are candidate chemosensory receptors in the vomeronasal organ.  
394 *Proc Natl Acad Sci U S A.* 2009;106(24):9842-7. doi: 10.1073/pnas.0904464106.
- 395 11. Wagner S, Gresser AL, Torello AT, Dulac C. A multireceptor genetic approach uncovers an  
396 ordered integration of VNO sensory inputs in the accessory olfactory bulb. *Neuron.*  
397 2006;50(5):697-709. doi: 10.1016/j.neuron.2006.04.033.
- 398 12. Ben-Shaul Y, Katz LC, Mooney R, Dulac C. In vivo vomeronasal stimulation reveals  
399 sensory encoding of conspecific and allospecific cues by the mouse accessory olfactory bulb.  
400 *Proc Natl Acad Sci U S A.* 2010;107(11):5172-7. doi: 10.1073/pnas.0915147107.

- 401 13. Meredith M. Vomeronasal, olfactory, hormonal convergence in the brain: cooperation or  
402 coincidence? *Ann N Y Acad Sci.* 1998;855(1 OLFACTION AND):349-61. doi:  
403 10.1111/j.1749-6632.1998.tb10593.x.
- 404 14. Tirindelli R, Dibattista M, Pifferi S, Menini A. From pheromones to behavior. *Physiol Rev.*  
405 2009;89(3):921-56. doi: 10.1152/physrev.00037.2008.
- 406 15. Wynn EH, Sánchez-Andrade G, Carss KJ, Logan DW. Genomic variation in the  
407 vomeronasal receptor gene repertoires of inbred mice. *BMC Genomics.* 2012;13:415. doi:  
408 10.1186/1471-2164-13-415.
- 409 16. Zhang J, Webb DM. Evolutionary deterioration of the vomeronasal pheromone transduction  
410 pathway in catarrhine primates. *Proc Natl Acad Sci U S A.* 2003;100(14):8337-41. doi:  
411 10.1073/pnas.1331721100.
- 412 17. Grus WE, Zhang J. Rapid turnover and species-specificity of vomeronasal pheromone  
413 receptor genes in mice and rats. *Gene.* 2004;340(2):303-12. doi: 10.1016/j.gene.2004.07.037.
- 414 18. Shi P, Bielawski JP, Yang H, Zhang Y-P. Adaptive diversification of vomeronasal receptor 1  
415 genes in rodents. *J Mol Evol.* 2005;60(5):566-76. doi: 10.1007/s00239-004-0172-y.
- 416 19. Shi P, Zhang J. Comparative genomic analysis identifies an evolutionary shift of  
417 vomeronasal receptor gene repertoires in the vertebrate transition from water to land.  
418 *Genome Res.* 2007;17(2):166-74. doi: 10.1101/gr.6040007.
- 419 20. Grus WE, Zhang J. Origin of the genetic components of the vomeronasal system in the  
420 common ancestor of all extant vertebrates. *Mol Biol Evol.* 2009;26(2):407-19. doi:  
421 10.1093/molbev/msn262.
- 422 21. Grus WE, Zhang J. Origin and evolution of the vertebrate vomeronasal system viewed  
423 through system-specific genes. *Bioessays.* 2006;28(7):709-18. doi: 10.1002/bies.20432.
- 424 22. Grus WE, Shi P, Zhang J. Largest vertebrate vomeronasal type 1 receptor gene repertoire in  
425 the semiaquatic platypus. *Mol Biol Evol.* 2007;24(10):2153-7. doi: 10.1093/molbev/msm157.
- 426 23. Young JM, Trask BJ. V2R gene families degenerated in primates, dog and cow, but  
427 expanded in opossum. *Trends Genet.* 2007;23(5):212-5. doi: 10.1016/j.tig.2007.03.004.
- 428 24. Young JM, Massa HF, Hsu L, Trask BJ. Extreme variability among mammalian V1R gene  
429 families. *Genome Res.* 2010;20(1):10-8. doi: 10.1101/gr.098913.109.

- 430 25. Young JM. Divergent V1R repertoires in five species: Amplification in rodents, decimation  
431 in primates, and a surprisingly small repertoire in dogs. *Genome Res* 2005;15(2):231-40.  
432 doi: 10.1101/gr.3339905.
- 433 26. Lane RP, Cutforth T, Axel R, Hood L, Trask BJ. Sequence analysis of mouse vomeronasal  
434 receptor gene clusters reveals common promoter motifs and a history of recent expansion.  
435 *Proc Natl Acad Sci.* 2002;99(1):291-6. doi: 10.1073/pnas.012608399.
- 436 27. Lane RP, Young J, Newman T, Trask BJ. Species specificity in rodent pheromone receptor  
437 repertoires. *Genome Res.* 2004;14(4):603-8. doi: 10.1101/gr.2117004.
- 438 28. Yang H, Shi P, Zhang Y-P, Zhang J. Composition and evolution of the V2r vomeronasal  
439 receptor gene repertoire in mice and rats. *Genomics.* 2005;86(3):306-15. doi:  
440 10.1016/j.ygeno.2005.05.012.
- 441 29. Couger MB, Arévalo L, Campbell P. A high quality genome for mus spicilegus, a close  
442 relative of house mice with unique social and ecological adaptations. *G3.* 2018;8(7):2145-52.  
443 doi: 10.1534/g3.118.200318.
- 444 30. Grus WE, Shi P, Zhang YP, Zhang J. Dramatic variation of the vomeronasal pheromone  
445 receptor gene repertoire among five orders of placental and marsupial mammals. *Proc Natl*  
446 *Acad Sci.* 2005;102(16):5767-72. doi: 10.1073/pnas.0501589102.
- 447 31. Duyck K, DuTell V, Ma L, Paulson A, Yu CR. Pronounced strain-specific chemosensory  
448 receptor gene expression in the mouse vomeronasal organ. *BMC Genomics.* 2017;18(1):965.  
449 doi: 10.1186/s12864-017-4364-4.
- 450 32. Meijer JH, Robbers Y. Wheel running in the wild. *Proc Biol Sci.* 2014;281(1786). Epub  
451 2014/05/23. doi: 10.1098/rspb.2014.0210. PubMed PMID: 24850923; PubMed Central  
452 PMCID: PMC4046404.
- 453 33. Sherwin CM. Voluntary wheel running: a review and novel interpretation. *Anim Behav.*  
454 1998;56(1):11-27. doi: 10.1006/anbe.1998.0836.
- 455 34. Garland T, Jr., Schutz H, Chappell MA, Keeney BK, Meek TH, Copes LE, et al. The  
456 biological control of voluntary exercise, spontaneous physical activity and daily energy  
457 expenditure in relation to obesity: human and rodent perspectives. *The Journal of*  
458 *experimental biology.* 2011;214(Pt 2):206-29. Epub 2010/12/24. doi: 10.1242/jeb.048397.  
459 PubMed PMID: 21177942.

- 460 35. Novak CM, Burghardt PR, Levine JA. The use of a running wheel to measure activity in  
461 rodents: relationship to energy balance, general activity, and reward. *Neuroscience and*  
462 *biobehavioral reviews*. 2012;36(3):1001-14. Epub 2012/01/11. doi:  
463 10.1016/j.neubiorev.2011.12.012. PubMed PMID: 22230703.
- 464 36. Lightfoot JT, EJC DEG, Booth FW, Bray MS, M DENH, Kaprio J, et al. Biological/Genetic  
465 Regulation of Physical Activity Level: Consensus from GenBioPAC. *Med Sci Sports Exerc*.  
466 2018;50(4):863-73. Epub 2017/11/23. doi: 10.1249/MSS.0000000000001499. PubMed  
467 PMID: 29166322.
- 468 37. Rhodes JS, Gammie SC, Garland T, Jr. Neurobiology of mice selected for high voluntary  
469 wheel-running activity. *Integrative and comparative biology*. 2005;45(3):438-55. Epub  
470 2005/06/01. doi: 10.1093/icb/45.3.438. PubMed PMID: 21676789.
- 471 38. Claghorn GC, Thompson Z, Wi K, Van L, Garland T, Jr. Caffeine stimulates voluntary  
472 wheel running in mice without increasing aerobic capacity. *Physiol Behav*. 2017;170:133-40.  
473 doi: 10.1016/j.physbeh.2016.12.031.
- 474 39. Drickamer LC, Evans TR. Chemosignals and activity of wild stock house mice, with a note  
475 on the use of running wheels to assess activity in rodents. *Behav Processes*. 1996;36(1):51-  
476 66. doi: 10.1016/0376-6357(95)00015-1.
- 477 40. Swallow JG, Carter PA, Garland T, Jr. Artificial selection for increased wheel-running  
478 behavior in house mice. *Behav Genet*. 1998;28(3):227-37. Epub 1998/07/22. PubMed  
479 PMID: 9670598.
- 480 41. Wallace IJ, Garland T, Jr. Mobility as an emergent property of biological organization:  
481 Insights from experimental evolution. *Evol Anthropol*. 2016;25(3):98-104. Epub 2016/06/18.  
482 doi: 10.1002/evan.21481. PubMed PMID: 27312181.
- 483 42. Kolb EM, Kelly SA, Garland T, Jr. Mice from lines selectively bred for high voluntary  
484 wheel running exhibit lower blood pressure during withdrawal from wheel access. *Physiol*  
485 *Behav*. 2013;112-113:49-55. doi: 10.1016/j.physbeh.2013.02.010.
- 486 43. Careau V, Wolak ME, Carter PA, Garland T. Limits to behavioral evolution: the quantitative  
487 genetics of a complex trait under directional selection. *Evolution*. 2013;67(11):3102-19. doi:  
488 10.1111/evo.12200.

- 489 44. Dewan I, Garland T, Hiramatsu L, Careau V. I smell a mouse: indirect genetic effects on  
490 voluntary wheel-Running distance, duration and speed. *Behavior Genetics*. 2019;49(1):49-59.  
491 doi: 10.1007/s10519-018-9930-2.
- 492 45. Kream RM, Margolis FL. Olfactory marker protein: turnover and transport in normal and  
493 regenerating neurons. *J Neurosci*. 1984;4(3):868-79.
- 494 46. Xu S, Garland T. A mixed model approach to genome-wide association studies for selection  
495 signatures, with application to mice bred for voluntary exercise behavior. *Genetics*.  
496 2017;207(2):785-99. Epub 2017/08/05. doi: 10.1534/genetics.117.300102. PubMed PMID:  
497 28774881; PubMed Central PMCID: PMC5629339.
- 498 47. Kolb EM, Rezende EL, Holness L, Radtke A, Lee SK, Obenaus A, et al. Mice selectively  
499 bred for high voluntary wheel running have larger midbrains: support for the mosaic model  
500 of brain evolution. *The Journal of experimental biology*. 2013;216(3):515-23. doi:  
501 10.1242/jeb.076000.
- 502 48. Swallow JG, Rhodes JS, Garland T, Jr. Phenotypic and evolutionary plasticity of organ  
503 masses in response to voluntary exercise in house mice. *Integr Comp Biol*. 2005;45(3):426-  
504 37. doi: 10.1093/icb/45.3.426.
- 505 49. Kelly SA, Gomes FR, Kolb EM, Malisch JL, Garland T, Jr. Effects of activity, genetic  
506 selection and their interaction on muscle metabolic capacities and organ masses in mice. *The*  
507 *Journal of experimental biology*. 2017;220(Pt 6):1038-47. doi: 10.1242/jeb.148759.
- 508 50. Kolb EM, Kelly SA, Middleton KM, Sermsakdi LS, Chappell MA, Garland T, Jr.  
509 Erythropoietin elevates VO<sub>2,max</sub> but not voluntary wheel running in mice. *J Exp Biol*.  
510 2010;213(3):510-9. Epub 2010/01/21. doi: 10.1242/jeb.029074. PubMed PMID: 20086137.
- 511 51. Kay JC, Claghorn GC, Thompson Z, Hampton TG, Garland T, Jr. Electrocardiograms of  
512 mice selectively bred for high levels of voluntary exercise: Effects of short-term exercise  
513 training and the mini-muscle phenotype. *Physiol Behav*. 2019;199:322-32. doi:  
514 10.1016/j.physbeh.2018.11.041.
- 515 52. Rezende EL, Gomes FR, Malisch JL, Chappell MA, Garland T, Jr. Maximal oxygen  
516 consumption in relation to subordinate traits in lines of house mice selectively bred for high  
517 voluntary wheel running. *J Appl Physiol*. 2006;101(2):477-85. doi:  
518 10.1152/jappphysiol.00042.2006.

- 519 53. Haga S, Hattori T, Sato T, Sato K, Matsuda S, Kobayakawa R, et al. The male mouse  
520 pheromone ESP1 enhances female sexual receptive behaviour through a specific  
521 vomeronasal receptor. *Nature*. 2010;466(7302):118-22. Epub 2010/07/03. doi:  
522 10.1038/nature09142. PubMed PMID: 20596023.
- 523 54. Ferrero DM, Moeller LM, Osakada T, Horio N, Li Q, Roy DS, et al. A juvenile mouse  
524 pheromone inhibits sexual behaviour through the vomeronasal system. *Nature*.  
525 2013;502(7471):368-71. Epub 2013/10/04. doi: 10.1038/nature12579. PubMed PMID:  
526 24089208; PubMed Central PMCID: PMC3800207.
- 527 55. Cheetham SA, Smith AL, Armstrong SD, Beynon RJ, Hurst JL. Limited variation in the  
528 major urinary proteins of laboratory mice. *Physiol Behav*. 2009;96(2):253-61. Epub  
529 2008/11/01. doi: 10.1016/j.physbeh.2008.10.005. PubMed PMID: 18973768.
- 530 56. Rhodes JS, Garland T, Jr., Gammie SC. Patterns of brain activity associated with variation in  
531 voluntary wheel-running behavior. *Behav Neurosci*. 2003;117(6):1243-56. Epub 2003/12/17.  
532 doi: 10.1037/0735-7044.117.6.1243. PubMed PMID: 14674844.
- 533 57. King JM. Effects of lesions of the amygdala, preoptic area, and hypothalamus on estradiol-  
534 induced activity in the female rat. *Journal of comparative and physiological psychology*.  
535 1979;93(2):360-7. Epub 1979/04/01. PubMed PMID: 457955.
- 536 58. Fahrbach SE, Meisel RL, Pfaff DW. Preoptic implants of estradiol increase wheel running  
537 but not the open field activity of female rats. *Physiol Behav*. 1985;35(6):985-92. Epub  
538 1985/12/01. doi: 10.1016/0031-9384(85)90270-7. PubMed PMID: 4095192.
- 539 59. Ogawa S, Chan J, Gustafsson J-Å, Korach KS, Pfaff DW. Estrogen increases locomotor  
540 activity in mice through estrogen receptor  $\alpha$ : specificity for the type of activity.  
541 *Endocrinology*. 2003;144(1):230-9. doi: 10.1210/en.2002-220519.
- 542 60. Spiteri T, Ogawa S, Musatov S, Pfaff DW, Ågmo A. The role of the estrogen receptor  $\alpha$  in  
543 the medial preoptic area in sexual incentive motivation, proceptivity and receptivity, anxiety,  
544 and wheel running in female rats. 2012;230(1):11-20. doi: 10.1016/j.bbr.2012.01.048.
- 545 61. Dobin A, Davis CA, Schlesinger F, Drenkow J, Zaleski C, Jha S, et al. STAR: ultrafast  
546 universal RNA-seq aligner. *Bioinformatics*. 2013;29(1):15-21. Epub 2012/10/30. doi:  
547 10.1093/bioinformatics/bts635. PubMed PMID: 23104886.
- 548 62. Trapnell C, Hendrickson DG, Sauvageau M, Goff L, Rinn JL, Pachter L. Differential  
549 analysis of gene regulation at transcript resolution with RNA-seq. *Nat Biotechnol*.

550 2013;31(1):46-53. Epub 2012/12/12. doi: 10.1038/nbt.2450. PubMed PMID: 23222703;  
551 PubMed Central PMCID: PMC3869392.

552



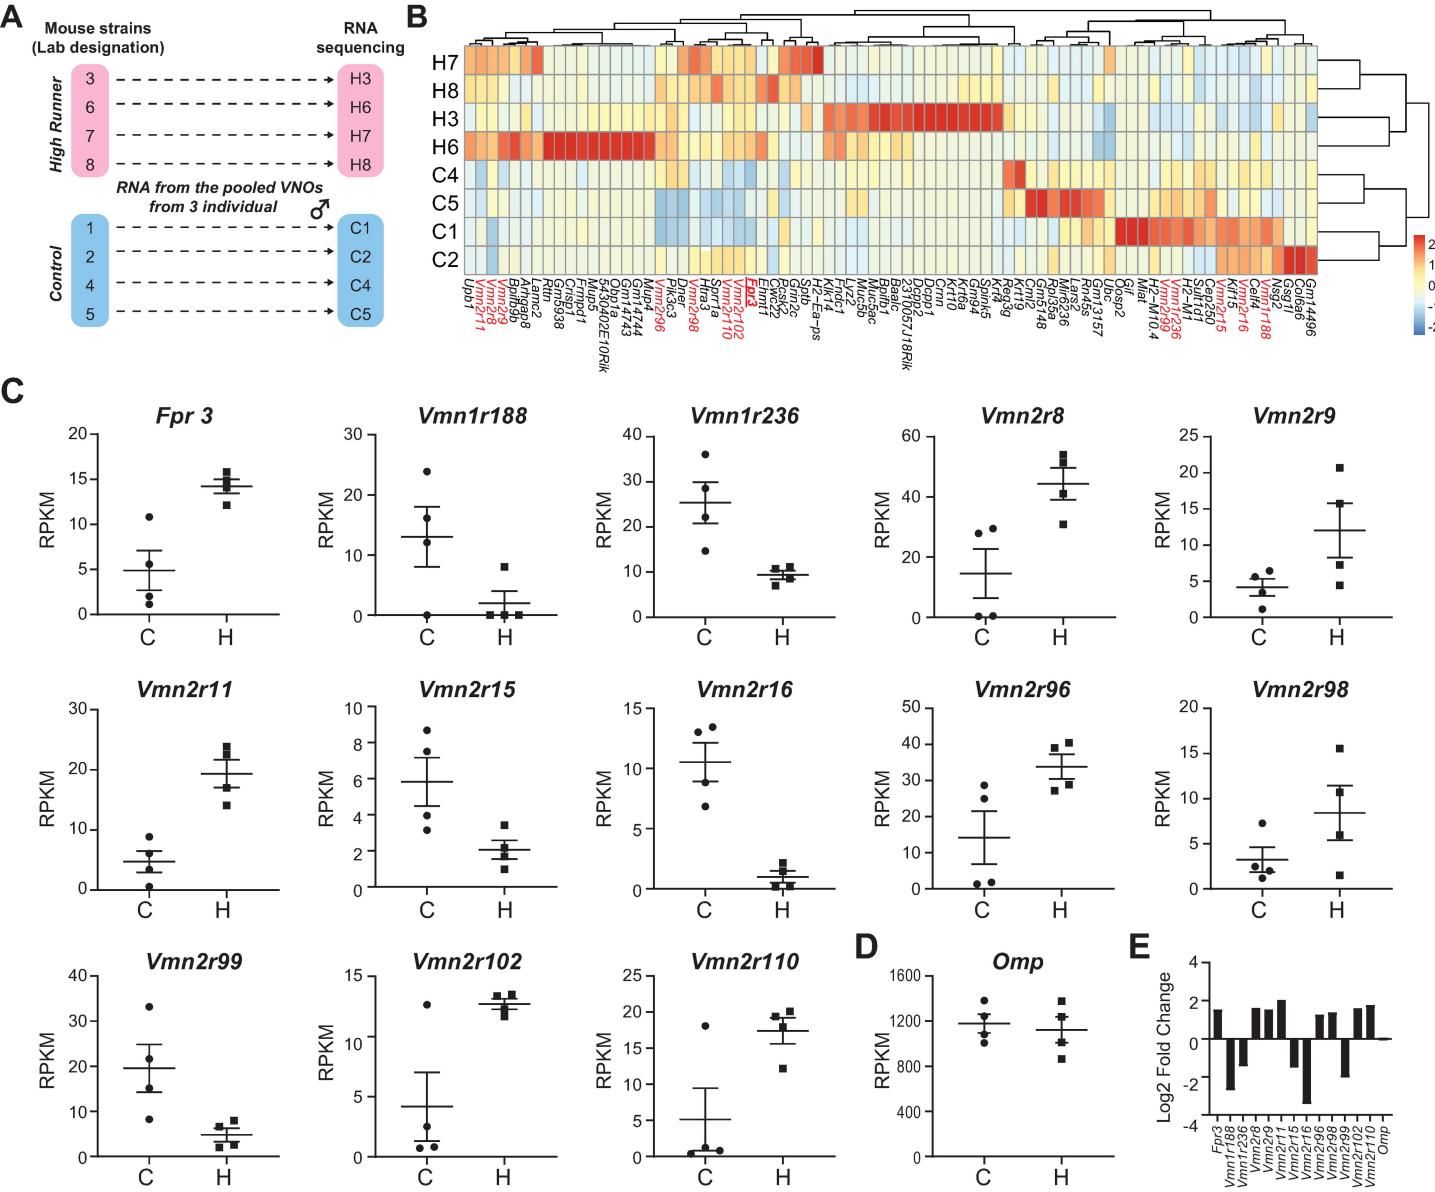

Figure 1

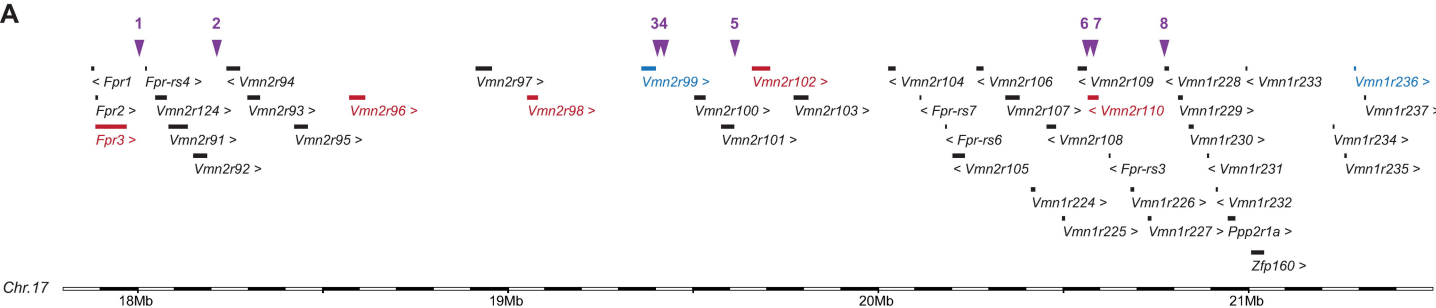

**B**

|   | SNP ID     | SNP location (mm10) | H / C | Gene (within 50kb) | strand | up/dw    | Distance (bp) |
|---|------------|---------------------|-------|--------------------|--------|----------|---------------|
| 1 | rs29503987 | 18001459            | C/A   | <i>Fpr-rs4</i>     | +      | up       | 20274         |
|   |            |                     |       | <i>Vmn2r124</i>    | +      | up       | 48025         |
| 2 | rs33375308 | 18210739            | T/C   | <i>Vmn2r92</i>     | +      | dw       | 25561         |
| 3 | rs33447983 | 19403011            | G/T   | <i>Vmn2r99</i>     | +      | dw       | 8421          |
| 4 | rs6224641  | 19424358            | A/G   | <i>Vmn2r99</i>     | +      | dw       | 29768         |
| 5 | rs33649277 | 19616228            | G/A   | <i>Vmn2r101</i>    | +      | dw       | 3911          |
|   |            |                     |       | <i>Vmn2r102</i>    | +      | up       | 44171         |
| 6 | rs29522462 | 20573305            | A/C   | <i>Vmn2r109</i>    | -      | up       | 8549          |
|   |            |                     |       | <i>Vmn2r110</i>    | -      | dw       | 524           |
| 7 | rs33120398 | 20587484            | C/T   | <i>Vmn2r109</i>    | -      | up       | 22728         |
|   |            |                     |       | <i>Vmn2r110</i>    | -      | intron 1 |               |
|   |            |                     |       | <i>Fpr-rs3</i>     | -      | dw       | 36362         |
| 8 | rs33463529 | 20779567            | G/A   | <i>Vmn1r227</i>    | +      | dw       | 43441         |
|   |            |                     |       | <i>Vmn1r228</i>    | -      | up       | 2066          |
|   |            |                     |       | <i>Vmn1r229</i>    | +      | up       | 34928         |

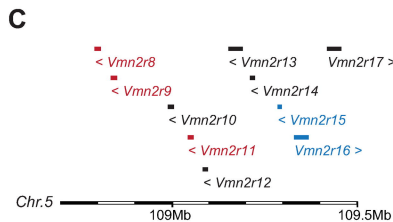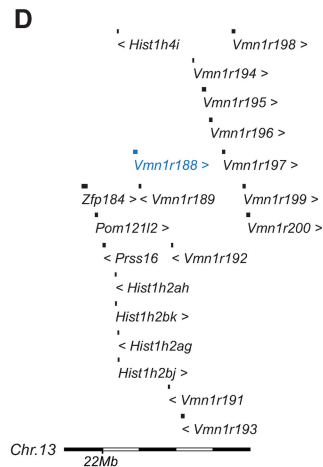

**Figure 2**

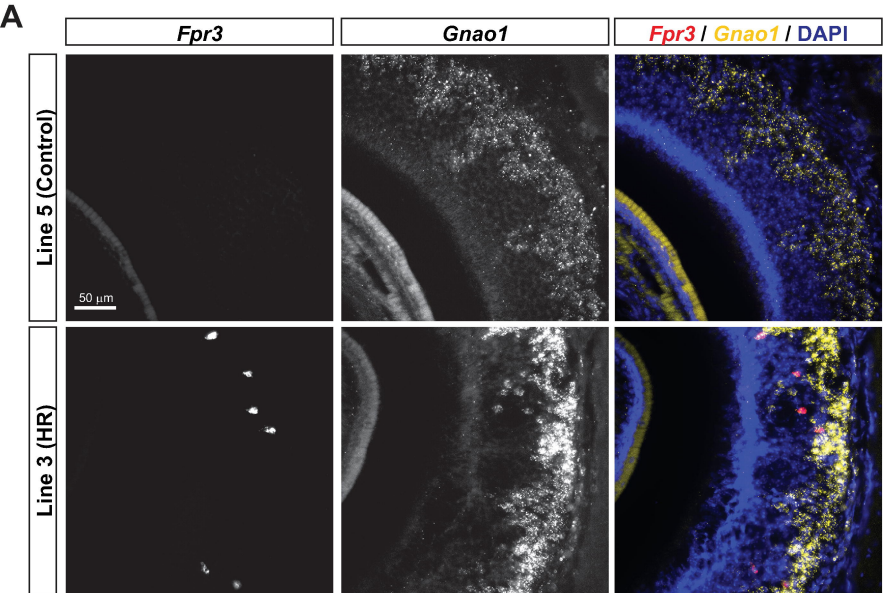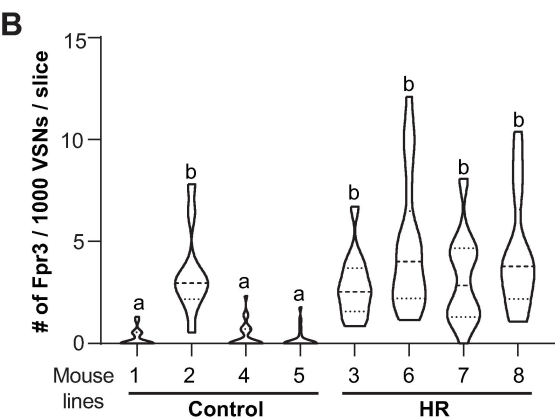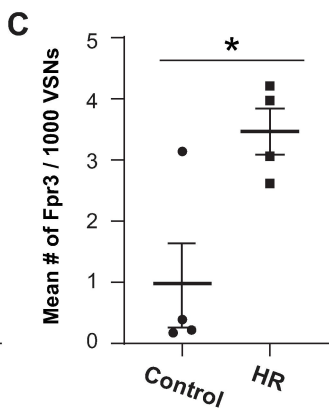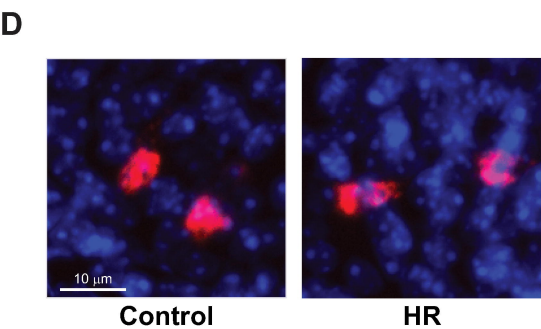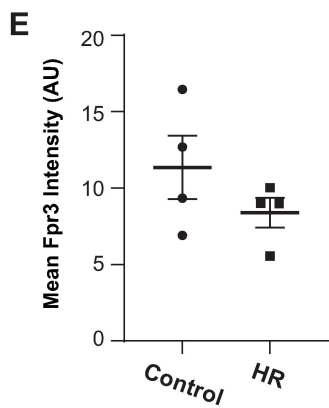

**Figure 3**
